# Supplementary material for: In situ electrochromic efficiency of a nickel oxide thin film: origin of electrochemical process and electrochromic degradation
Source: Royal Society of Chemistry journal article supplement (doi:10.1039/c7tc04696k), 2017-12-20
Supplement: c7tc04696k1.pdf [file c7tc04696k1.pdf]

## Supporting information for In-situ electrochromic efficiency of nickel oxide thin film: origin of electrochemical process and electrochromic degradation

By: Qirong Liu, Qianqian Chen, Qianqian Zhang, Yu Xiao, Xiaolan Zhong, Guobo Dong, Marie-Paule Delplancke-Ogletree, Herman Terryn, Kitty Baert, François Reniers, Xungang Diao\*

Corresponding Author: Xungang Diao\*

Contact :diao\_xg@buaa.edu.cn,

School of Physics and Nuclear Energy Engineering, Beihang University, Beijing 100191, China

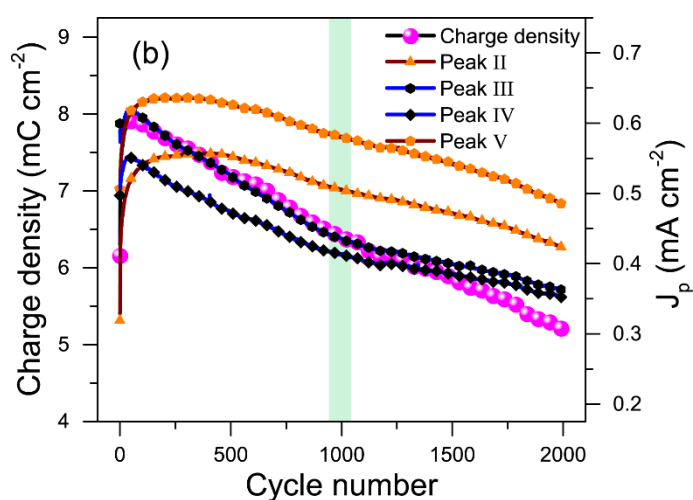

Figure S1. Evolutions of transferred charge density and current density at different peaks corresponding to CVs versus cycle number.
